# Supplementary material for: Pt–Cu hierarchical quasi great dodecahedrons with abundant twinning defects for hydrogen evolution
Source: Royal Society of Chemistry journal article supplement (doi:10.1039/c7cc03643d), 2017-01-01
Supplement: c7cc03643d1.pdf [file c7cc03643d1.pdf]

## Supporting Information

### **Pt-Cu Hierarchical Quasi Great Dodecahedrons with Abundant Twinning Defects for Hydrogen Evolution†**

Ruijie Huang,<sup>‡a</sup> Zhongti Sun,<sup>‡a</sup> Sheng Chen<sup>a</sup>, Siyu Wu<sup>a</sup>, Zeqi Shen<sup>a</sup>, Xiaojun Wu,<sup>\*a</sup> Jie Zeng<sup>\*a</sup>

<sup>a</sup> Hefei National Laboratory for Physical Sciences at the Microscale & Department of Chemical  
Physics, University of Science and Technology of China, Hefei, Anhui 230026, P. R. China

## Experiment section

### Materials

Hexachloroplatinic (IV) acid hexahydrate ( $\text{H}_2\text{PtCl}_6 \cdot 6\text{H}_2\text{O}$ ), Cupric chloride dehydrate ( $\text{CuCl}_2 \cdot 2\text{H}_2\text{O}$ ), poly(vinylpyrrolidone) (PVP,  $M_w \approx 30,000$ ), potassium iodide (KI), ethylene glycol (EG) were purchased from Sinopharm Chemical Reagent Co. Ltd. All chemical reagents were used as received without further purification. Ultrapure Millipore water ( $18.2 \text{ M}\Omega \cdot \text{cm}$ ) was used in the synthesis. All the vials were made of borosilicate glass, with a white phenolic molded screw cap and polyvinyl-faced pulp liner.

### Synthesis of Pt-Cu HQGDs.

In a typical synthesis of Pt-Cu HQGDs, an aqueous solution of KI (5 M, 40  $\mu\text{L}$ ),  $\text{H}_2\text{PtCl}_6$  (40 mM, 1 mL),  $\text{CuCl}_2$  (50 mM, 1 mL), and PVP (160 mg), were mixed together in EG (10 mL) in a 20-mL vial. After the vial had been capped, the mixture was stirred for around 3 min. The resulting homogeneous mixture was transferred into an oil bath and heated at 115  $^\circ\text{C}$  for 10 h before it was cooled to room temperature. The products were collected by centrifugation at 10,000 rpm for 10 min, and then washed with ethanol-acetone mixture twice.

### Preparation of working electrodes.

The catalysts dispersed onto a glassy carbon rotating disk electrode (RDE, PINE, PA, USA) were used as a working electrode for HER activity measurement and cycling stability test. The RDE has a diameter of 5 mm and a geometric area of 0.196  $\text{cm}^2$ . The electrode was firstly polished with emery paper of decreasing grades and then with  $\text{Al}_2\text{O}_3$  powders with a size down to 0.05  $\mu\text{m}$ . Prior to the deposition of catalysts, the electrode was thoroughly rinsed with Ultrapure Millipore water three times and then immersed in ethanol to remove contaminants. For the commercial Pt/C (JM, 20 wt% Pt) and the Pt-Cu HQGDs/C (20 wt% Pt), aqueous dispersions were prepared and sonicated for 30 min. 5  $\mu\text{L}$  of the dispersion was then transferred onto the RDE (all the quantities of the Pt were 1.0  $\text{mg mL}^{-1}$ ). In this case, the loading amounts of Pt were kept as 25.5  $\mu\text{g cm}^{-2}$  for all the samples. Before electrocatalytic measurements, the working electrode was cleaned with plasma (Plasma Cleaner PDC-002, USA) at a power level of 10.5 W for 3 min to remove residue organics, followed by the addition of 10  $\mu\text{L}$  of 0.05 wt% Nafion (diluted from 5 wt% Nafion,

Sigma-Aldrich) to cover on the surface of the catalysts. Then the working electrode was dried in air.

The catalysts dispersed onto a 1\*1cm<sup>2</sup> square carbon paper were used as a working electrode for HER chronopotentiometry. In this case, the loading amounts of noble metals were kept as 500  $\mu\text{g cm}^{-2}$  for all the samples.

### **Electrochemical measurements.**

Electrochemical measurements were carried out with a three-electrode system on an IM6 electrochemical workstation (Zahner, Germany). Pt wires and Ag/AgCl were used as the counter and reference electrodes, respectively. Hundreds of potential cycles were conducted in a 0.5 M H<sub>2</sub>SO<sub>4</sub> solution with continuous Ar gas in the potential region from 0.05 to 1.20 V at a sweep rate of 50 mV s<sup>-1</sup> till the cyclic voltammetry curves (CVs) stayed unchanged, in order to release residue organics and ions. Before the HER measurement, the electrolyte (0.5 M H<sub>2</sub>SO<sub>4</sub>) was degassed by bubbling pure hydrogen for at least 30 min to ensure the H<sub>2</sub>O/H<sub>2</sub> equilibrium at 0 V. The polarization curves were obtained by sweeping the potential from -0.3 to 0.1 V at room temperature and 1,600 rpm to remove the in situ-formed H<sub>2</sub> bubbles on the RDE, with a sweep rate of 5 mV s<sup>-1</sup>. The CV was conducted between -0.3 and 0.1 V at 50 mV s<sup>-1</sup> for 5,000 times to investigate the cycling stability. All potentials were converted to values with reference to a reversible hydrogen electrode (RHE).

### **RHE calibration.**

In all measurements, we used Ag/AgCl as the reference electrode. It was calibrated with respect to RHE. The calibration was performed in the high-purity hydrogen-saturated electrolyte with a Pt foil as the working electrode. The CV was conducted at a scan rate of 1 mV s<sup>-1</sup>. The average of two potentials at which the current crossed 0 was taken to be the thermodynamic potential for the HER measurement. In a 0.5 M H<sub>2</sub>SO<sub>4</sub> solution,  $E_{\text{RHE}} = E_{\text{Ag/AgCl}} + 0.20 \text{ V}$ .

### **Instrumentations.**

Scanning electron microscope (SEM) images were obtained with a scanning electron microscope (SEM, JSM-6700F) operated at 5 kV. Transmission electron microscopy (TEM) images were taken using a Hitachi H-7650 transmission electron microscope at an acceleration voltage of 100 kV. High-resolution TEM (HRTEM), high-angle annular dark-field scanning TEM (HAADF-STEM), and energy dispersive X-ray (EDX) analysis were collected on a JEOL ARM-200F field-emission transmission electron microscope operating at 200 kV accelerating voltage. Power X-ray diffraction (PXRD) characterization was performed using a Philips X'Pert Pro X-ray diffractometer with a monochromatized Cu K $\alpha$  radiation source and a wavelength of 0.1542 nm. ICP-AES (Atomscan Advantage, Thermo Jarrell Ash, USA) was used to determine the

concentration of Pt and Cu.

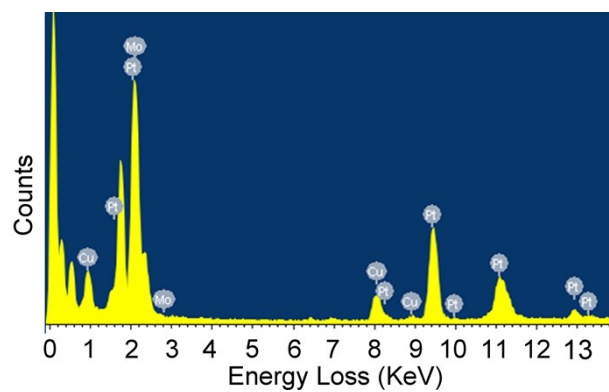

**Figure S1.** The corresponding EDX spectrum of an individual Pt-Cu HQGD shown in Figure 2A.

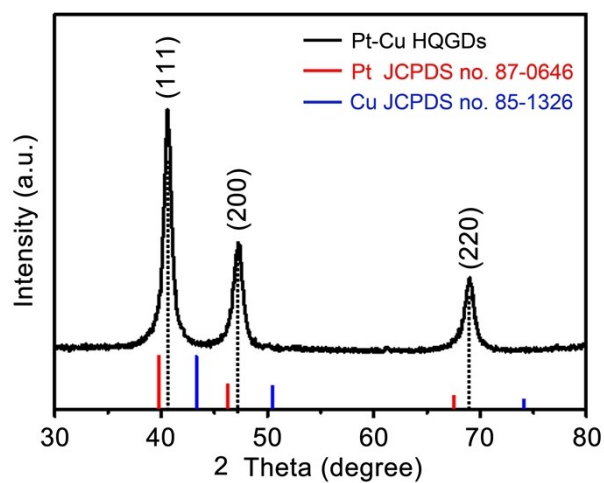

**Figure S2.** Powder X-ray diffraction (PXRD) pattern of as-prepared Pt-Cu HQGDs. The standard diffraction peaks for Pt and Cu elements are also shown for comparison.

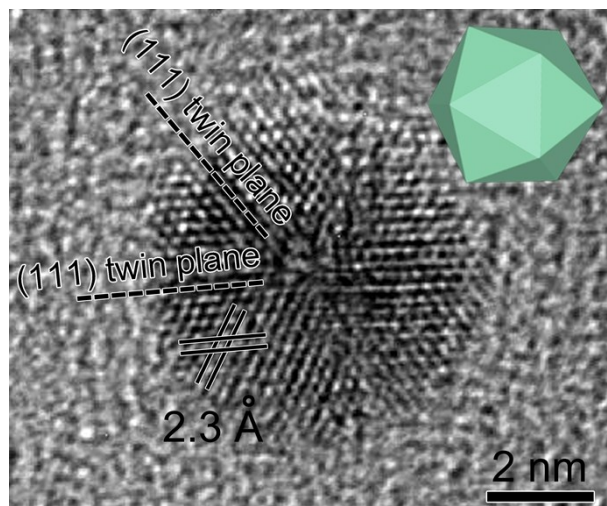

**Figure S3.** HRTEM image of an individual nanocrystal obtained at 1 h. The inset shows the corresponding geometrical model of the nanocrystal. The fringe spacing of 2.3 Å corresponds to the {111} planes. The (111) twin planes are indicated by dash lines.

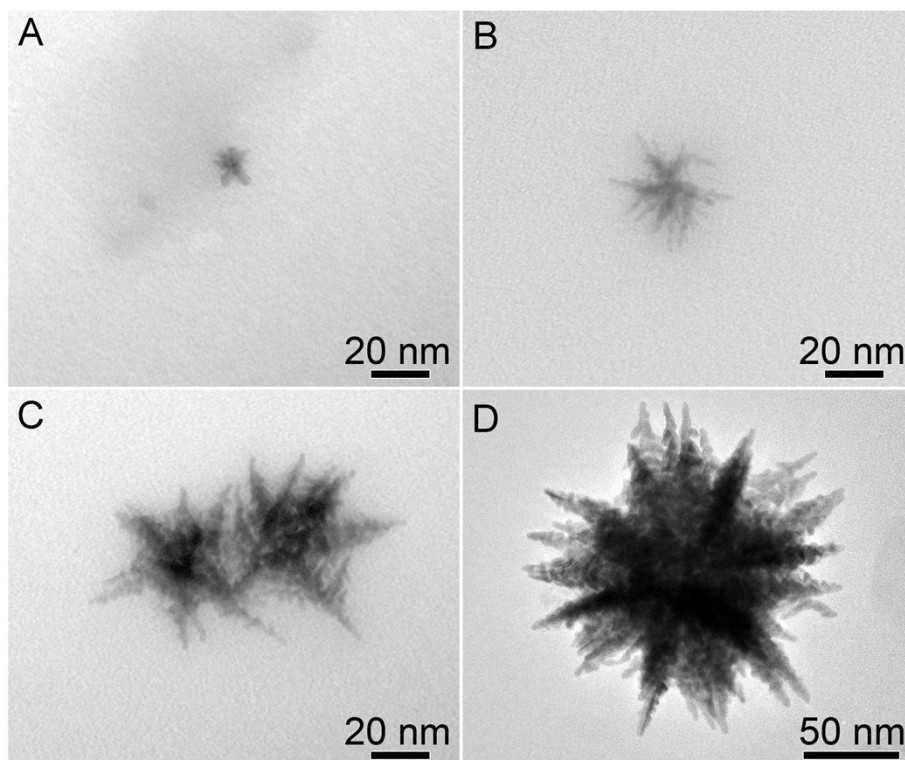

**Figure S4.** TEM images of Pt-Cu nanocrystals at different reaction stages: (A)  $t=1.5$  h, (B)  $t=2$  h, (C)  $t=3$  h, and (D)  $t=10$  h.

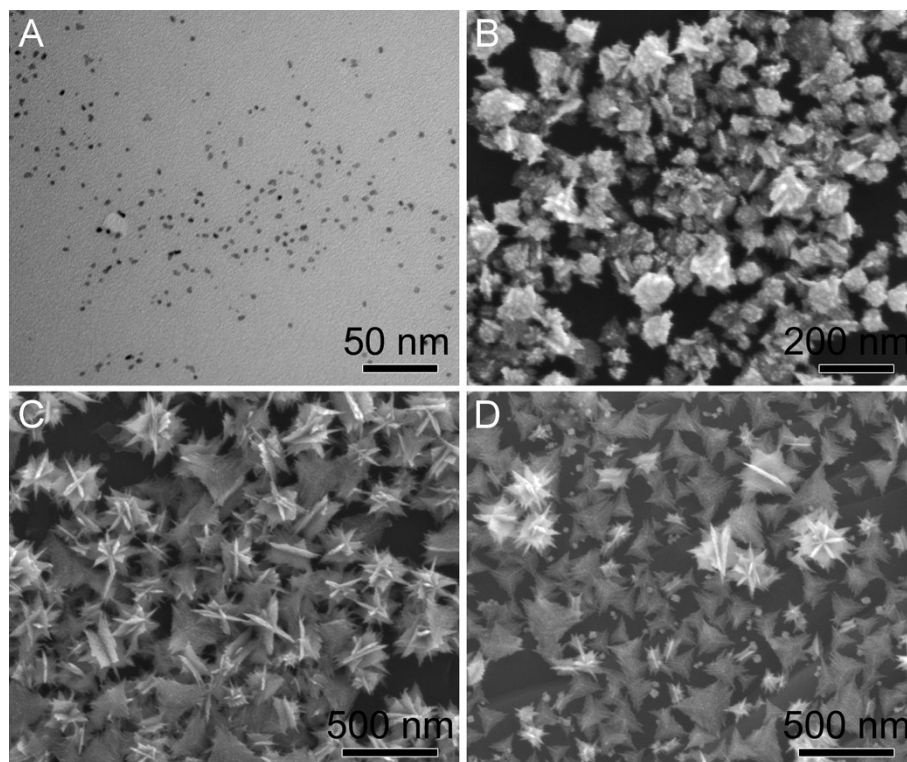

**Figure S5.** TEM and SEM images of nanocrystals obtained with the addition of different amounts of KI aqueous solution in the synthesis without changes of the other conditions: (A) 0  $\mu\text{L}$ , (B) 20  $\mu\text{L}$ , (C) 80  $\mu\text{L}$ , and (D) 160  $\mu\text{L}$ .

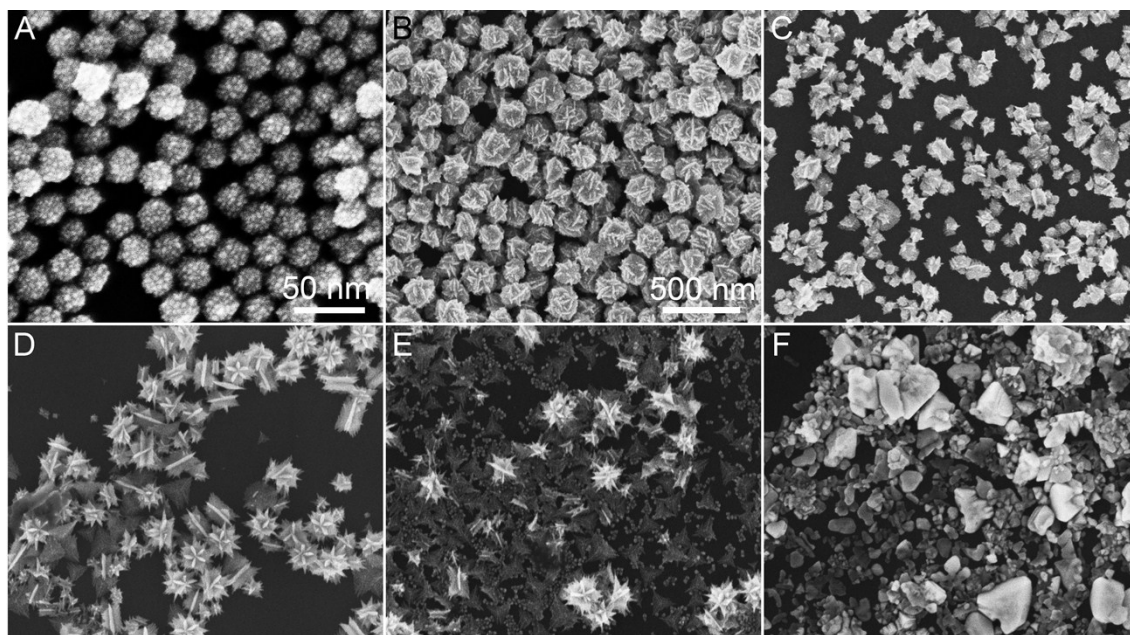

**Figure S6.** SEM images of nanocrystals obtained with the addition of precursors with different ratios of Pt/Cu without changes of the other conditions: (A) Pt only, (B) 7:1, (C) 4:1, (D) 1:2, (E) 1:4, and (F) Cu only. The scale bar in B also applies to C-F.

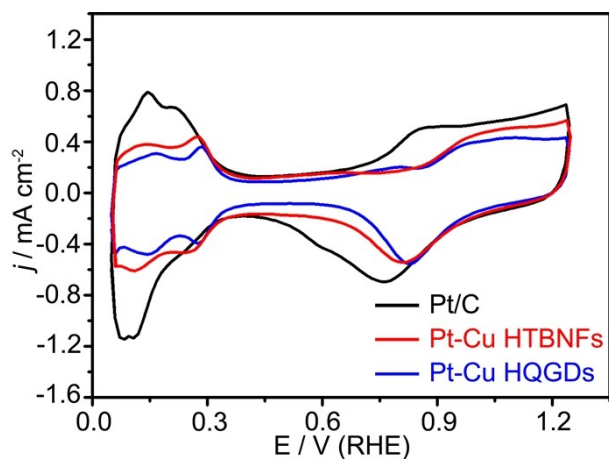

**Figure S7.** CVs of Pt-Cu HQGDs, Pt-Cu HTBNFs and Pt/C were recorded in Ar-purged 0.5 M H<sub>2</sub>SO<sub>4</sub> solution at room temperature with a sweep rate of 50 mV·s<sup>-1</sup>. The ECSA of Pt-Cu HQGDs, Pt-Cu HTBNFs and Pt/C were 24.2, 30.6 and 54.7 m<sup>2</sup> g<sup>-1</sup> by measuring the charge associated with the hydrogen adsorption/desorption region from CVs.

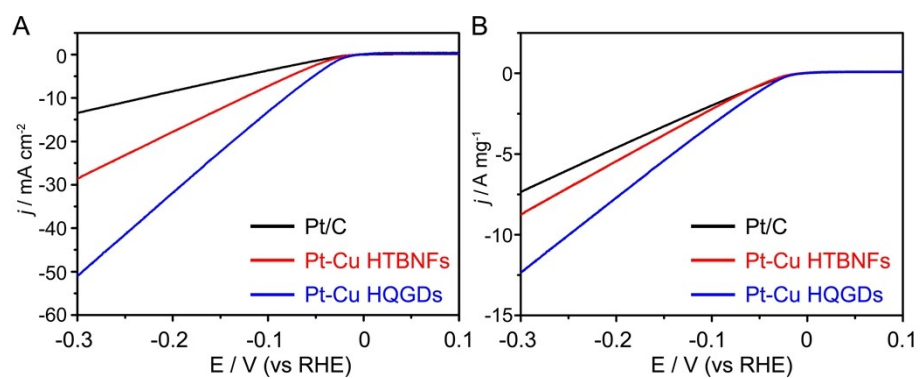

**Figure S8.** (A) Specific activities and (B) mass activities of Pt-Cu HQGDs, Pt-Cu HTBNFs and Pt/C.

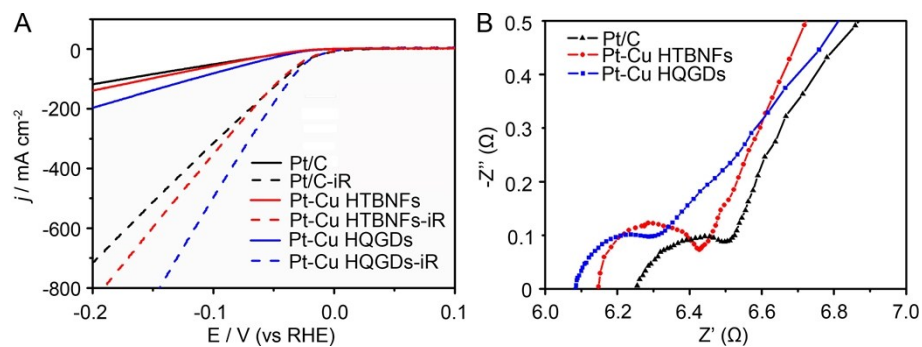

**Figure S9.** (a) Polarization curves towards HER for commercial Pt/C, Pt-Cu HTBNFs and Pt-Cu HQGDs. Short dash lines show corresponding  $iR$ -corrected data. (b) Nyquist plots of commercial Pt/C, Pt-Cu HTBNFs and Pt-Cu HQGDs.

**Table S1.** Parameters obtained by iR correction according to the resistance of solution.

| Catalyst     | $R_s$ (ohm) | $j$ (mA cm <sup>-2</sup> )@-0.1 V<br>(without iR correction) | $j$ (mA cm <sup>-2</sup> )@-0.1 V<br>(with iR correction) |
|--------------|-------------|--------------------------------------------------------------|-----------------------------------------------------------|
| Pt/C         | 6.25        | 51                                                           | 317                                                       |
| Pt-Cu HTBNFs | 6.15        | 57                                                           | 354                                                       |
| Pt-Cu HQGDs  | 6.08        | 82                                                           | 494                                                       |

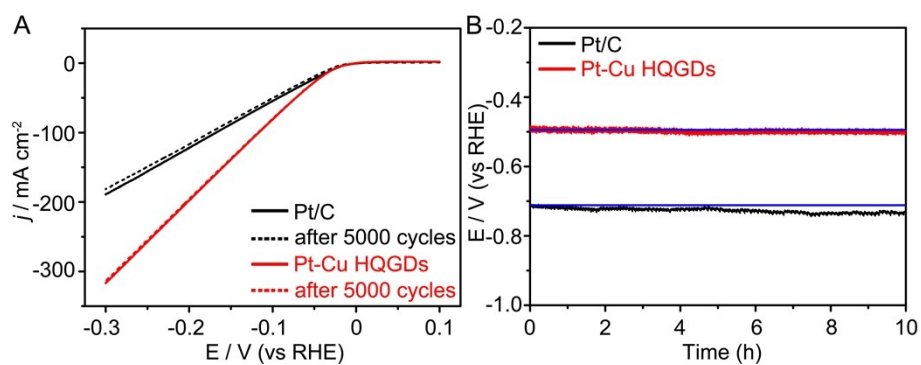

**Figure S10.** (A) Polarization curves for HER of commercial Pt/C (black) and Pt-Cu HQGDs (red) before (solid lines) and after (dash lines) the durability tests. The durability tests were carried out in a H<sub>2</sub>-purged 0.5 M H<sub>2</sub>SO<sub>4</sub> solution from -0.3 V to 0.1 V for 5000 cycles at a scan rate of 50 mV s<sup>-1</sup>. (B) HER chronopotentiometry of polarization curves for HER of commercial Pt/C and Pt-Cu HQGDs under a constant current density of 500 mA cm<sup>-2</sup> in 0.5 M H<sub>2</sub>SO<sub>4</sub> solution.

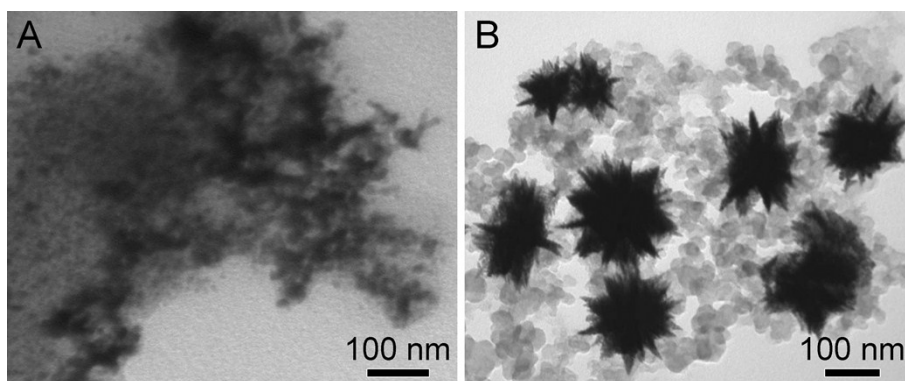

**Figure S11.** TEM images of (A) commercial Pt/C and (B) Pt-Cu HQGDs after the CV measurements. The tests were conducted in a  $\text{H}_2$ -purged 0.5 M  $\text{H}_2\text{SO}_4$  solution from -0.3 V to 0.1 V for 5000 cycles at a scan rate of  $50 \text{ mV s}^{-1}$ .

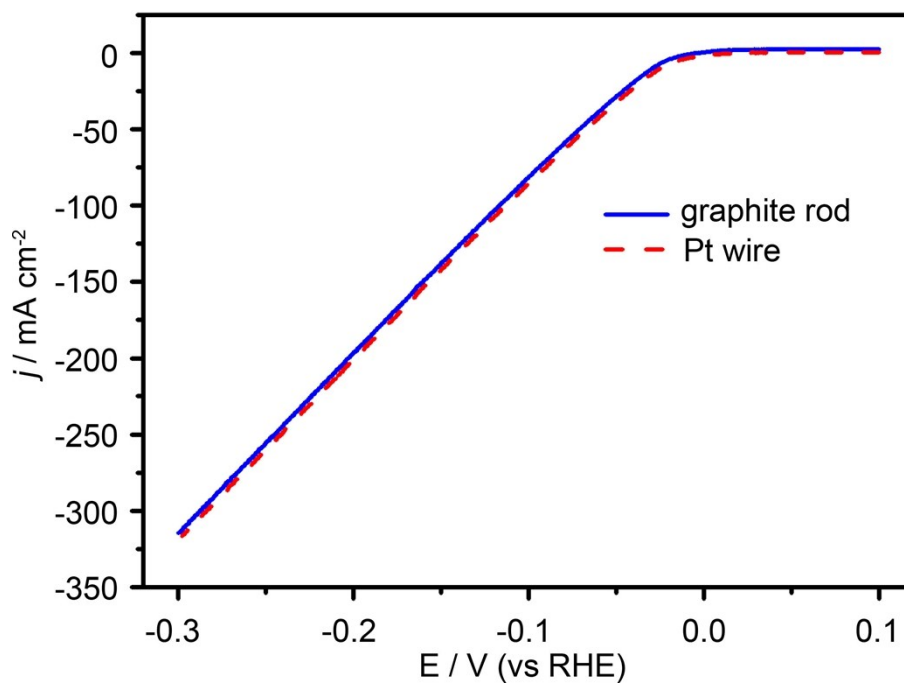

**Figure S12.** Polarization curves towards HER for Pt-Cu HQGDs with Pt wires (red dashed line) and graphite rod (blue solid line) as counter electrode after the durability tests. The durability tests were carried out in a  $\text{H}_2$ -purged 0.5 M  $\text{H}_2\text{SO}_4$  solution from -0.3 V to 0.1 V for 5000 cycles at a scan rate of  $50 \text{ mV s}^{-1}$ .
